# Supplementary material for: The crucial role of clay binders in the performance of ZSM-5 based materials for biomass catalytic pyrolysis
Source: Royal Society of Chemistry journal article supplement (doi:10.1039/c8cy02116c), 2019-01-01
Supplement: c8cy02116c1.pdf [file c8cy02116c1.pdf]

## The crucial role of clay binders on the performance of ZSM-5 based materials for biomass catalytic pyrolysis

Héctor Hernando,<sup>a,b</sup> Cristina Ochoa-Hernández,<sup>c,†</sup> Mariya Shamzhy,<sup>c</sup> Inés Moreno,<sup>a,b</sup> Javier Feroso,<sup>a</sup> Patricia Pizarro,<sup>a,b</sup> Juan M. Coronado,<sup>a,‡</sup> Jiří Čejka,<sup>c</sup> David P. Serrano<sup>a,b\*</sup>

<sup>a</sup> Thermochemical Processes Unit, IMDEA Energy Institute, 28935, Móstoles, Madrid, Spain.

<sup>b</sup> Chemical and Environmental Engineering Group, ESCET, Rey Juan Carlos University, 28933, Móstoles, Madrid, Spain.

<sup>c</sup> J. Heyrovský Institute of Physical Chemistry, Czech Academy of Sciences, v.v.i., 182 23, Prague 8, Czech Republic.

<sup>†</sup> Current affiliation address: Department of Heterogeneous Catalysis, Max-Planck-Institut für Kohlenforschung, 45470, Mülheim an der Ruhr, Germany.

<sup>‡</sup> Current affiliation address: Instituto de Catálisis y Petroleoquímica-CSIC, C/Marie Curie 2, Cantoblanco, 28049, Madrid, Spain.

### Supporting information

## 2. Experimental

### 2.2 Products characterisation and data treatment

#### 2.2.6 Gas chromatography coupled to mass spectrometry

An external calibration of the GC-MS was carried out using the most representative compounds of each group, which included a total of 13 compounds (acetic acid, diethoxypropane, furfural, phenol, guaiacol, cresol, creosol, syringol, toluene, xylene, trimethylbenzene, naphthalene and levoglucosan), being calibrated using 10 different concentrations. With these standards, a relative area of at least 67% was accurately quantified for the experiments included in this article. The response factors of the remaining compounds were estimated as the average response factor of the corresponding group.

## 3. Results and discussion

### 3.2 Pyrolysis of wheat straw using technical catalysts

**Table S1.** Mass yield of gaseous hydrocarbons obtained in the WS-ac pyrolysis over both pure clays and ZSM-5 based catalysts.

| Sample                        | Light paraffins (wt%·10 <sup>-2</sup> ) |                               |                               |                                | Light olefins (wt%·10 <sup>-2</sup> ) |                               |                               |
|-------------------------------|-----------------------------------------|-------------------------------|-------------------------------|--------------------------------|---------------------------------------|-------------------------------|-------------------------------|
|                               | CH <sub>4</sub>                         | C <sub>2</sub> H <sub>6</sub> | C <sub>3</sub> H <sub>8</sub> | C <sub>4</sub> H <sub>10</sub> | C <sub>2</sub> H <sub>4</sub>         | C <sub>3</sub> H <sub>6</sub> | C <sub>4</sub> H <sub>8</sub> |
| Non-catalytic                 | 34.3                                    | 5.6                           | 2.0                           | 0.4                            | 5.5                                   | 4.5                           | 0.4                           |
| BNT                           | 36.1                                    | 6.4                           | 2.1                           | 0.5                            | 6.3                                   | 5.0                           | 0.5                           |
| ATP                           | 38.7                                    | 7.4                           | 2.2                           | 0.6                            | 6.4                                   | 4.9                           | 0.5                           |
| ZrO <sub>2</sub> /n-ZSM-5     | 33.4                                    | 6.7                           | 2.6                           | 1.2                            | 8.5                                   | 12.8                          | 2.3                           |
| ZrO <sub>2</sub> /n-ZSM-5-BNT | 41.2                                    | 7.7                           | 2.5                           | 1.1                            | 8.3                                   | 9.1                           | 2.1                           |
| ZrO <sub>2</sub> /n-ZSM-5-ATP | 61.0                                    | 11.8                          | 4.0                           | 2.8                            | 14.7                                  | 22.3                          | 4.1                           |

**Table S2.** Amount (referred to the raw catalyst weight) and elemental composition of the coke deposited over both pure clays and ZSM-5 based catalysts during WS-ac pyrolysis.

| Catalyst                      | %Coke | Ultimate analysis (wt%) |      |     |      |
|-------------------------------|-------|-------------------------|------|-----|------|
|                               |       | C                       | H    | N   | O    |
| BNT                           | 5.2   | 36.0                    | 9.7  | 0.2 | 54.2 |
| ATP                           | 10.7  | 58.9                    | 5.9  | 1.3 | 33.9 |
| ZrO <sub>2</sub> /n-ZSM-5     | 12.8  | 81.2                    | 6.2  | 1.5 | 11.1 |
| ZrO <sub>2</sub> /n-ZSM-5-BNT | 9.3   | 60.2                    | 11.7 | 1.1 | 27.0 |
| ZrO <sub>2</sub> /n-ZSM-5-ATP | 12.2  | 57.6                    | 4.8  | 1.6 | 36.1 |
